# Supplementary material for: Muscle forces and the demands of human walking
Source: PubMed Central journal article supplement (PMC8325943; doi:10.1242/bio.058595), 2021-07-19
Supplement: biolopen-10-058595-s1.pdf [file biolopen-10-058595-s1.pdf]

**Table S1.** Marker Names / Abbreviations in Model: Parent body segment. Anatomical description of the marker location. Coordinate directions optimized during parameter identification. If empty, all coordinate directions fixed.

| Marker Name      | Parent Segment | Anatomical Description                                                | Optimized Coordinate Direction |
|------------------|----------------|-----------------------------------------------------------------------|--------------------------------|
| Glabella         | Skull          | Glabella                                                              |                                |
| LAcrom, RAcrom   | Thorax         | Left and right acromion of clavicles                                  | X                              |
| LASIS, RASIS     | Pelvis         | Left and right anterior superior                                      |                                |
| LCrest, RCrest   | Pelvis         | Left and right iliac crest, most laterally projecting point           | X,Y,Z                          |
| LILB             | Pelvis         | Lower back plate placed over junction of sacrum and lower lumbar      | Y,Z                            |
| LAST, RAST       | Thigh          | Left and right anterior, superior position on thigh plate             | X,Y,Z                          |
| LAIT, RAIT       | Thigh          | Left and right anterior, inferior position on thigh plate             | X,Y,Z                          |
| LPIT, RPIT       | Thigh          | Left and right posterior, inferior position on thigh plate            | X,Y,Z                          |
| LLatTib, RLatTib | Shank          | Most laterally projecting point on left and right tibial plateaus     | X,Z                            |
| LTibTub, RTibTub | Shank          | Left and right tibial tuberosities [most anteriorly projecting point] | X,Y,Z                          |
| LMedTib, RMedTib | Shank          | Most medially projecting point on left and right tibial plateaus      | X,Z                            |
| LLatMal, RLatMal | Shank          | Most laterally projecting point on left and right lateral malleoli    | X,Y,Z                          |
| LMedMal, RMedMal | Shank          | Most laterally projecting point on left and right lateral malleoli    | Z                              |
| LMT5, RMT5       | Foot           | Left and right 5 <sup>th</sup> metatarsal head                        |                                |
| LMT1, RMT1       | Foot           | Left and right 1 <sup>st</sup> metatarsal head                        |                                |
| LHeel, RHeel     | Foot           | Most posteriorly projecting point on left and right calcanei          | Y                              |

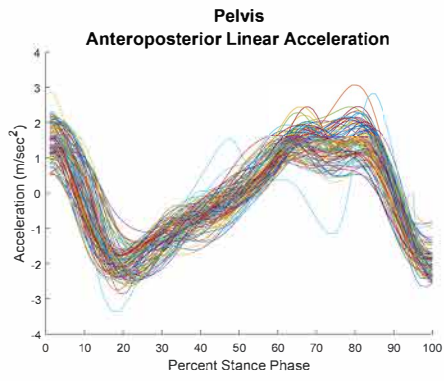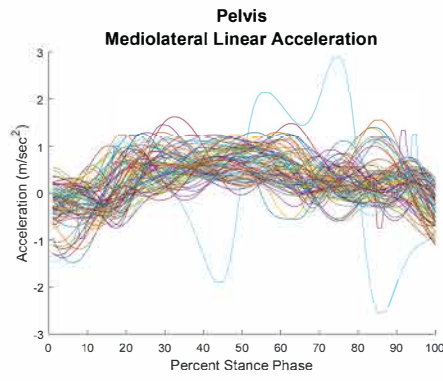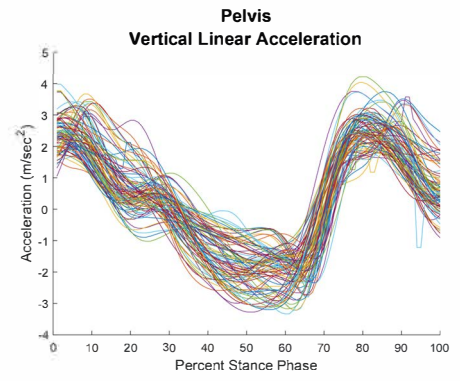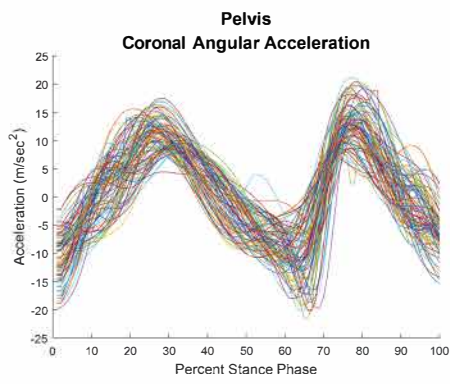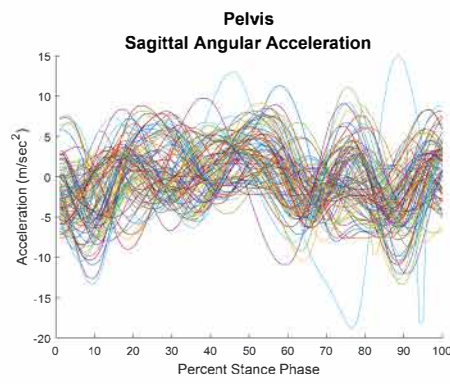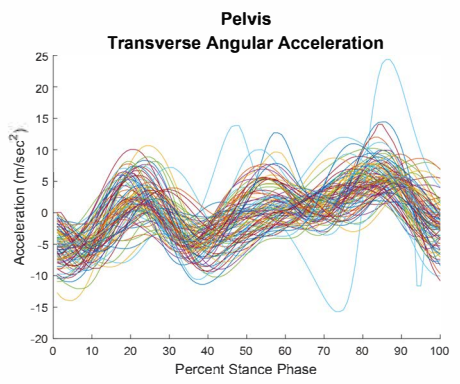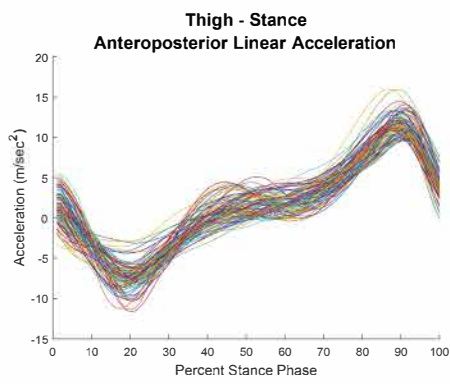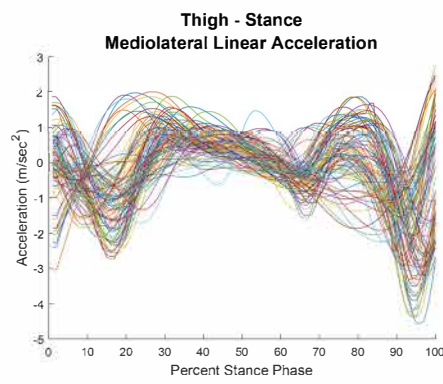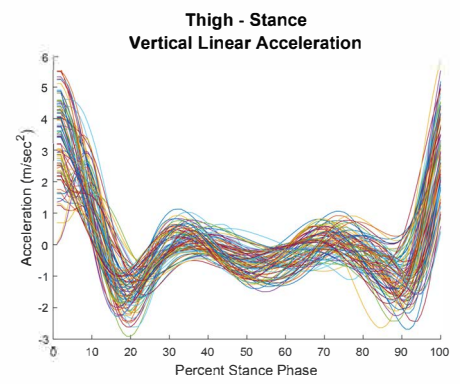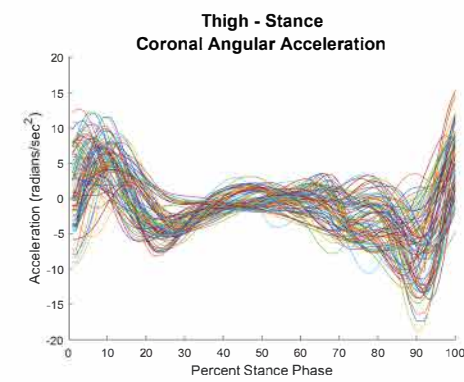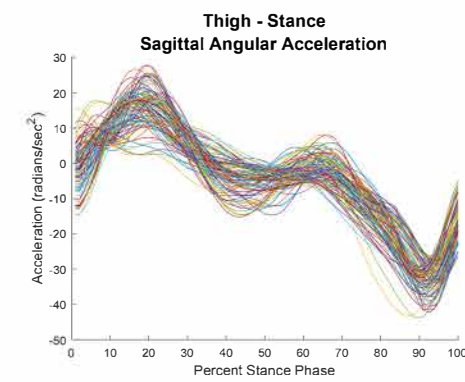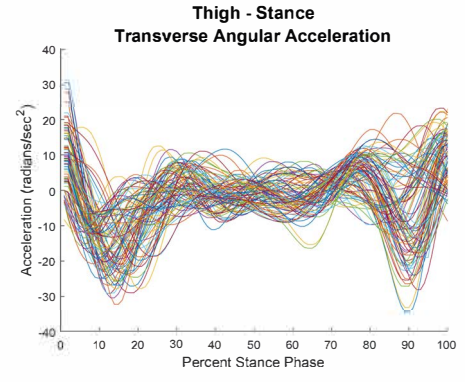

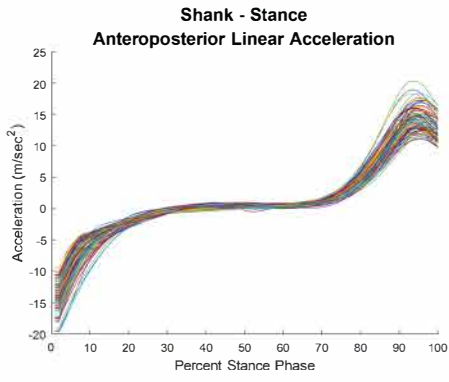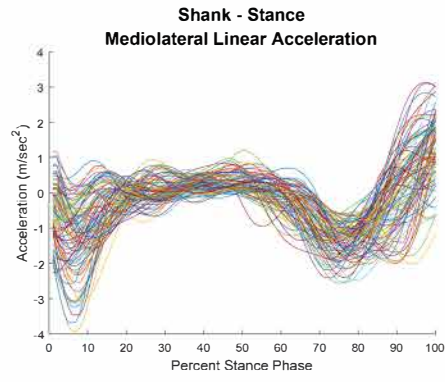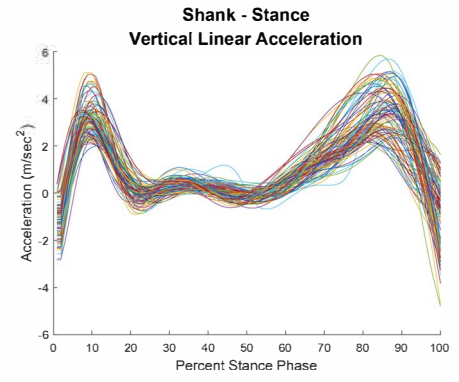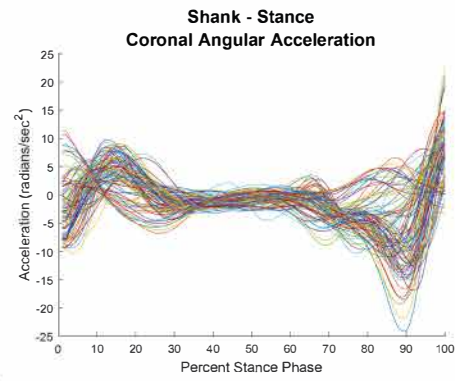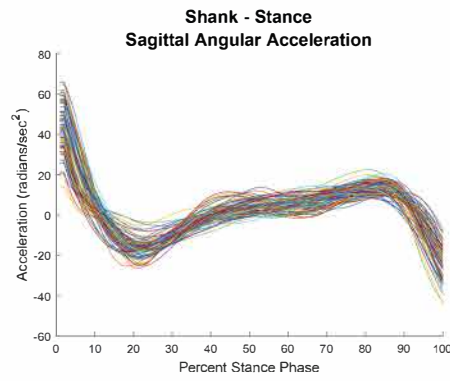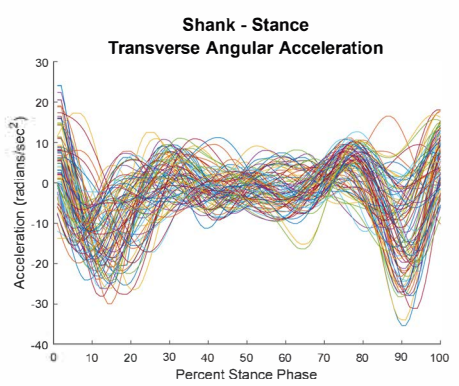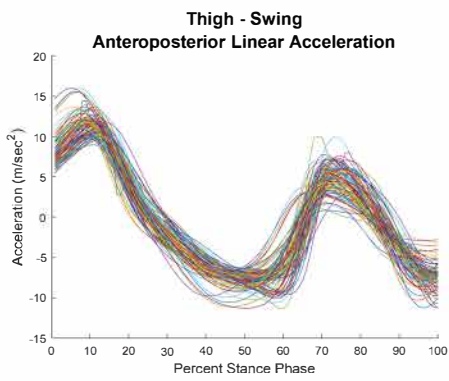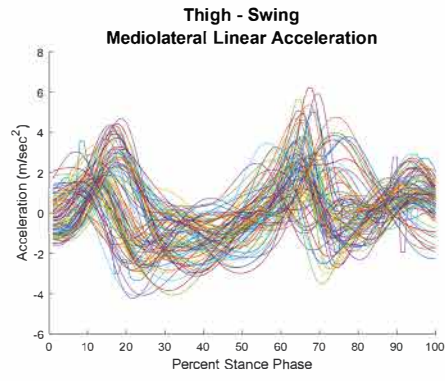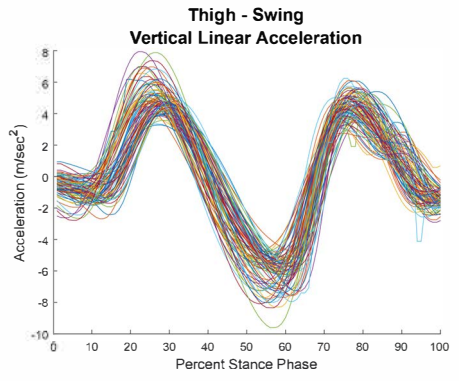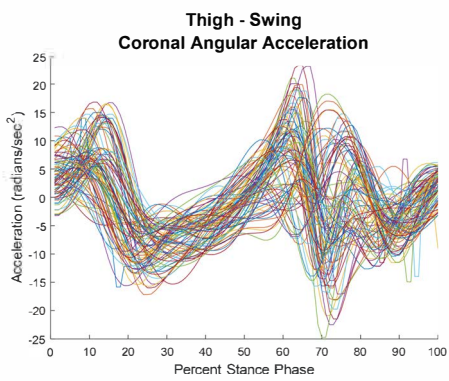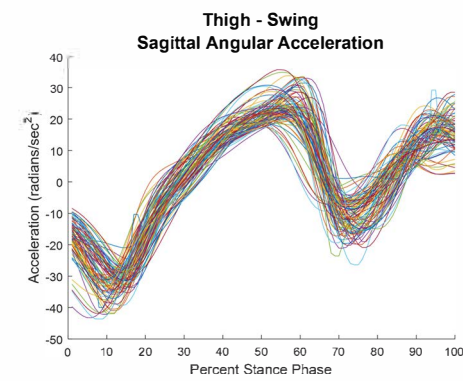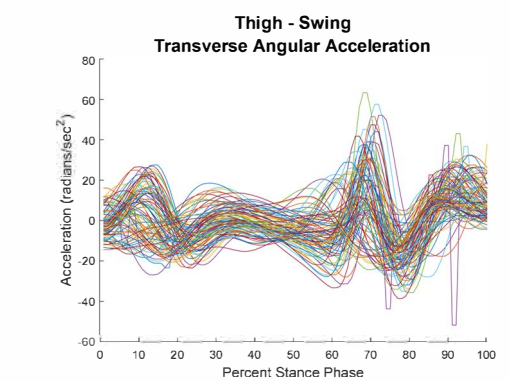

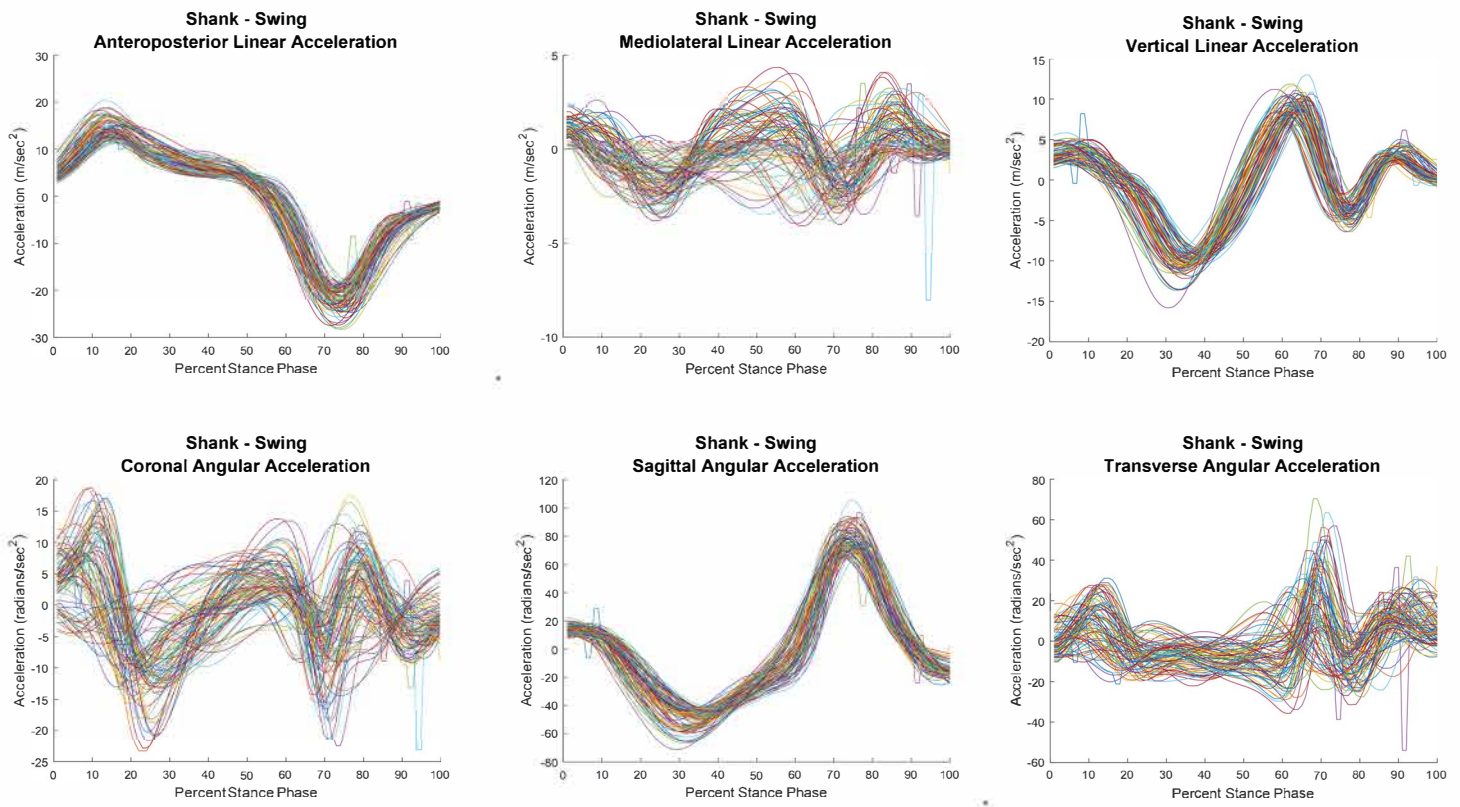

Figure S1. Segment Linear and Angular Accelerations for Each Walking Stance Phase (n=92)
